# Supplementary material for: Aromatase Inhibitors and Risk of Metabolic and Cardiovascular Adverse Effects in Breast Cancer Patients—A Systematic Review and Meta-Analysis
Source: MDPI journal article supplement (doi:10.3390/jcm11113133), 2022-05-31
Supplement: s1 [file s1]

Supplementary Table S1. Search results in each query - cardiovascular and metabolic adverse events in postmenopausal women with breast cancer receiving aromatase inhibitors (on 27 Oct 2020)

|   |                                                                                                                                                                                                                                                                                                                                                                                                             | Embase<br>+<br>Medline |
|---|-------------------------------------------------------------------------------------------------------------------------------------------------------------------------------------------------------------------------------------------------------------------------------------------------------------------------------------------------------------------------------------------------------------|------------------------|
| 1 | 'breast tumor':ab,ti OR 'breast tumor'/exp OR 'breast tumor'                                                                                                                                                                                                                                                                                                                                                | 24 363                 |
| 2 | 'aromatase inhibitor':ab,ti OR 'aromatase inhibitor'/exp OR<br>'anastrozole'/exp OR 'arimidex'/exp OR 'letrozole'/exp OR<br>'femara'/exp OR 'exemestane'/exp OR 'aromasin'/exp                                                                                                                                                                                                                              | 3 008                  |
| 3 | 'cardiovascular disease'/exp OR 'ischemic heart disease'/exp<br>OR 'heart infarction'/exp OR 'cerebrovascular accident'/exp<br>OR 'body weight'/exp OR 'obesity'/exp OR 'diabetes<br>mellitus'/exp OR 'dyslipidemia'/exp OR 'glucose<br>intolerance'/exp OR 'insulin resistance'/exp OR<br>'hyperglycemia'/exp OR 'hypercholesterolemia'/exp OR<br>'hypertriglyceridemia'/exp OR 'metabolic syndrome X'/exp | 264 359                |
| 5 | #1 AND #2 AND #3                                                                                                                                                                                                                                                                                                                                                                                            | 629                    |
