# Supplementary material for: Aromatase Inhibitors and Risk of Metabolic and Cardiovascular Adverse Effects in Breast Cancer Patients—A Systematic Review and Meta-Analysis
Source: MDPI journal article supplement (doi:10.3390/jcm11113133), 2022-05-31
Supplement: s1 [file s1]

| Trial                        | Selection bias             |                        | Performance bias         | Detection bias      | Attrition bias     | Reporting bias    | Other bias |
|------------------------------|----------------------------|------------------------|--------------------------|---------------------|--------------------|-------------------|------------|
|                              | Random Sequence Generation | Allocation Concealment | Blinding of participants | Blinding of outcome | Incomplete Outcome | Selective outcome |            |
| FATA-GIM3 [13]               | -                          | +                      | +                        | +                   | -                  | -                 | ?          |
| SUCCESS C [14]               | ?                          | ?                      | +                        | +                   | ?                  | ?                 | -          |
| FACE [15]                    | -                          | +                      | +                        | +                   | -                  | -                 | -          |
| Iwata et al, 2013 [16]       | -                          | ?                      | -                        | -                   | -                  | -                 | ?          |
| MA.27 [17]                   | -                          | +                      | +                        | +                   | -                  | -                 | -          |
| PROACT [18]                  | -                          | ?                      | -                        | ?                   | -                  | -                 | -          |
| N-SAS BC04 [19]              | ?                          | ?                      | +                        | +                   | -                  | -                 | -          |
| TEAM [20]                    | -                          | -                      | +                        | +                   | -                  | -                 | -          |
| N-SAS BC03 [21]              | ?                          | ?                      | +                        | +                   | -                  | -                 | -          |
| EORTC, phase III [22]        | -                          | +                      | +                        | +                   | -                  | -                 | -          |
| ARNO-95 [23]                 | -                          | -                      | +                        | +                   | -                  | -                 | -          |
| IES [24]                     | -                          | -                      | -                        | -                   | -                  | -                 | -          |
| ITA [25]                     | ?                          | ?                      | ?                        | ?                   | -                  | -                 | -          |
| BIG-98 [26]                  | -                          | -                      | -                        | -                   | -                  | -                 | -          |
| MA.17 [27]                   | ?                          | ?                      | -                        | -                   | -                  | -                 | -          |
| EORTC, phase II [28]         | -                          | +                      | +                        | +                   | -                  | -                 | -          |
| ATAC [29]                    | -                          | -                      | -                        | -                   | -                  | -                 | -          |
| TARGET [30]                  | -                          | ?                      | -                        | -                   | -                  | -                 | -          |
| Nabholtz et al, 2000 [31]    | -                          | -                      | -                        | -                   | ?                  | ?                 | -          |
| NRG Oncology/NSABP B-42 [32] | -                          | -                      | -                        | ?                   | ?                  | -                 | -          |
| ANZ 0501 LATER [33]          | -                          | +                      | +                        | +                   | -                  | -                 | -          |

Supplementary Table S2. Quality assessment of included studies. Legend: low risk of bias (-), high risk of bias (+), unclear risk of bias (?)
