# Supplementary material for: Aromatase Inhibitors and Risk of Metabolic and Cardiovascular Adverse Effects in Breast Cancer Patients—A Systematic Review and Meta-Analysis
Source: MDPI journal article supplement (doi:10.3390/jcm11113133), 2022-05-31

## Supplementary Material S2: sensitivity analysis.

In the sensitivity analysis, were made the assumptions that studies with incidence rate of events < 0,01 (1%) will be excluded, therefore it only applies to cardiovascular events.

### Cardiovascular events:

1. AIs vs. tamoxifen (monotherapy) – all (left) vs. without low incidence (right)

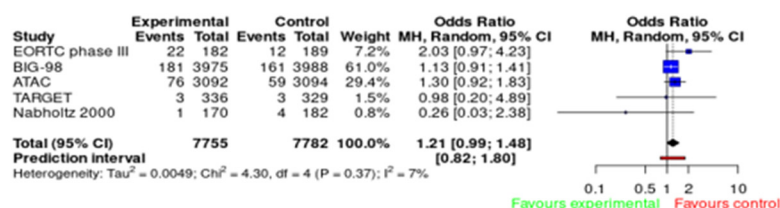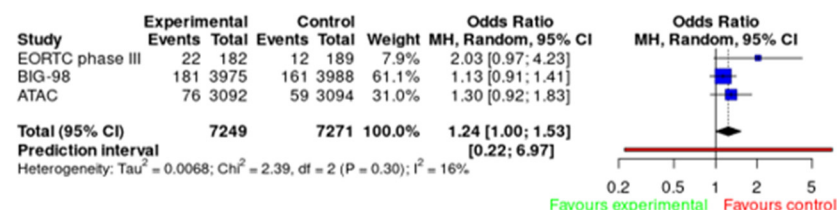

2. AIs (monotherapy) or AIs+tamoxifen (sequence) vs. tamoxifen (monotherapy) - all (left) vs. without low incidence (right)

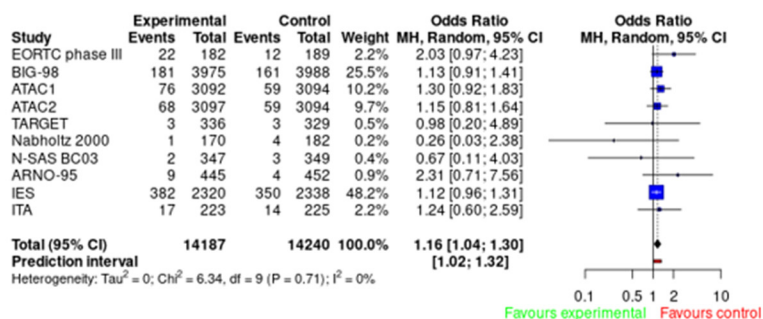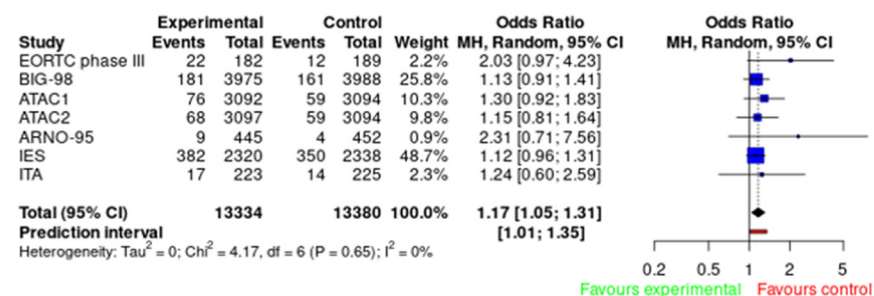

3. AIs (monotherapy) vs. AIs+tamoxifen (sequence) or tamoxifen (monotherapy) - all (left) vs. without low incidence (right)

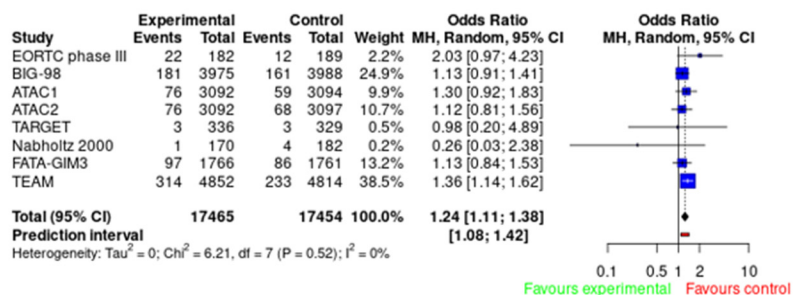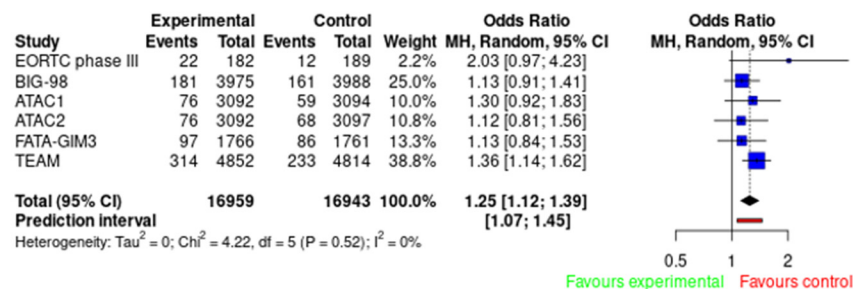

Supplement: s1 [file s1]
